# Supplementary material for: Antioxidant, antihypertensive, anti-hyperglycemic, and antimicrobial activity of aqueous extracts from twelve native plants of the Yucatan coast
Source: PubMed Central journal article supplement (PMC6436768; doi:10.1371/journal.pone.0213493), 2019-03-27
Supplement: pone.0213493.s001.pdf [file pone.0213493.s001.pdf]

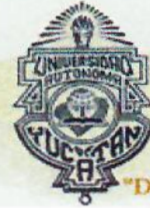

**UADY**

CENTRO DE  
INVESTIGACIONES  
REGIONALES  
"DR. HIDEYO NOGUCHI"

## COMITÉ DE ÉTICA EN INVESTIGACIÓN

Mérida, Yucatán, México, a 20 de enero de 2018

| DICTAMEN                                                                                                                                                                                       |                                                                                                                                                                         |                  |                          |
|------------------------------------------------------------------------------------------------------------------------------------------------------------------------------------------------|-------------------------------------------------------------------------------------------------------------------------------------------------------------------------|------------------|--------------------------|
| 1ª REVISIÓN                                                                                                                                                                                    | FECHA: 25 ENERO 2018                                                                                                                                                    | CIRB-03-2018     | PROTOCOLO: INVESTIGACIÓN |
| <b>TÍTULO</b>                                                                                                                                                                                  | Las plantas de la duna costera y del manglar de la península de Yucatán son fuente potencial de metabolitos contra hongos patógenos de cultivo de importancia económica |                  |                          |
| <b>RESPONSABLES:</b><br><b>Adscripción</b>                                                                                                                                                     | Dra. Cecilia Mónica Rodríguez García.                                                                                                                                   |                  |                          |
| <b>DONDE SE REALIZARÁ EL ESTUDIO:</b>                                                                                                                                                          | Centro de Investigación Científica de Yucatán (CICY)                                                                                                                    |                  |                          |
| <b>Teléfonos:</b>                                                                                                                                                                              | 9992557711                                                                                                                                                              | <b>Correo-e:</b> | koyi@cicy.mx             |
| <b>Dudas y observaciones acerca del protocolo</b>                                                                                                                                              |                                                                                                                                                                         |                  |                          |
| 1. Este proyecto fue evaluado de forma colegiada y con apego a las normas y leyes vigentes internacionales y de nuestro país.                                                                  |                                                                                                                                                                         |                  |                          |
| 2. El riesgo de los sujetos de investigación es mínima (encuesta a los sujetos de investigación) Artículo 23, Reglamento de la Ley General de Salud en Materia de Investigación para la Salud. |                                                                                                                                                                         |                  |                          |
| 3. Daño mínimo, no maleficencia, con justicia retributiva, confidencialidad y conservación en privado de la identidad del sujeto de estudio.                                                   |                                                                                                                                                                         |                  |                          |
| <b>RECOMENDACIONES</b>                                                                                                                                                                         |                                                                                                                                                                         |                  |                          |
| Informe al Comité de Ética en Investigación cada año de los avances.                                                                                                                           |                                                                                                                                                                         |                  |                          |
| Entregar informe de proyecto finalizado                                                                                                                                                        |                                                                                                                                                                         |                  |                          |
| <b>DICTAMEN:</b>                                                                                                                                                                               | APROBADO                                                                                                                                                                |                  |                          |

**Atentamente**

Fernando Isaías Puerto Manzano  
VOCAL PRESIDENTE

Marco Antonio Torres Castro  
VOCAL SECRETARIO
